# Supplementary material for: Hydrogenation of pyrrolizin-3-ones; new routes to pyrrolizidines
Source: Royal Society of Chemistry journal article supplement (doi:10.1039/b910199c), 2009-01-01
Supplement: b910199c.pdf [file b910199c.pdf]

**Supplementary Information:** Despinoy and McNab

## **Hydrogenation of pyrrolizin-3-ones; new routes to pyrrolizidines.**

**Xavier L. M. Despinoy and Hamish McNab\***

*<sup>b</sup>School of Chemistry, The University of Edinburgh, West Mains Road, Edinburgh UK  
EH9 3JJ*

[\*H.McNab@ed.ac.uk\*](mailto:H.McNab@ed.ac.uk)

### **Supporting Information**

|                                                                                           |         |
|-------------------------------------------------------------------------------------------|---------|
| 1,2-Dihydro-1-hydroxy-7-methylpyrrolizin-3-one <b>45</b>                                  | page S2 |
| 1-Acetoxy-1,2-dihydro-7-methylpyrrolizin-3-one <b>48</b>                                  | page S2 |
| 1-Acetoxy-1,2-dihydro-7-methoxycarbonylpyrrolizin-3-one <b>52</b>                         | page S2 |
| 7-Acetoxymethyl-1,2-dihydro-1-hydroxypyrrolizin-3-one <b>55</b>                           | page S3 |
| <sup>1</sup> H NMR chemical shifts of pyrrolizidin-3-one <b>4</b>                         | page S3 |
| NOE results for <b>46</b> and <b>47</b> , and for <b>49</b> and <b>50</b>                 | page S4 |
| Effect of catalysts and solvent on the hydrogenation of <b>31</b>                         | page S4 |
| Effect of catalysts and solvent on the diastereoselectivity of hydrogenation of <b>34</b> | page S4 |
| Effect of catalysts and solvent on the diastereoselectivity of hydrogenation of <b>38</b> | page S5 |
| Selected <sup>1</sup> H NMR data of <i>cis</i> -1-substituted pyrrolizidin-3-ones         | page S5 |
| Effect of catalysts and solvent on the diastereoselectivity of hydrogenation of <b>45</b> | page S6 |
| Effect of catalysts and solvent on the diastereoselectivity of hydrogenation of <b>48</b> | page S6 |
| References                                                                                | page S6 |

### 1,2-Dihydro-1-hydroxy-7-methylpyrrolizin-3-one 45

Reaction of a stirred solution of 7-methylpyrrolizin-3-one<sup>1</sup> **16** (284 mg, 2.1 mmol) in dichloromethane (20 cm<sup>3</sup>) with dry hydrogen chloride as previously reported<sup>2</sup> gave 1-chloro-1,2-dihydro-7-methylpyrrolizin-3-one as an orange oil (Found: M<sup>+</sup>, 169.0307. C<sub>8</sub>H<sub>8</sub>ClNO requires *M*, 169.0294); δ<sub>H</sub> 7.00 (1H, d, <sup>3</sup>*J* 3.1), 6.33 (1H, d, <sup>3</sup>*J* 3.1), 5.39 (1H, dd, <sup>3</sup>*J* 7.3 and 1.8), 3.63 (1H, dd, <sup>2</sup>*J* 19.0 and <sup>3</sup>*J* 7.3), 3.21 (1H, dd, <sup>2</sup>*J* 19.0 and <sup>3</sup>*J* 1.8) and 2.11 (3H, s); δ<sub>C</sub> 167.54 (quat), 134.04 (quat), 121.92, 118.82 (quat), 112.25, 46.78, 45.72 and 10.18; *m/z* 171 (M<sup>+</sup>, 42%), 169 (M<sup>+</sup>, 62), 135 (47), 134 (87), 133 (72), 106 (78), 105 (61), 104 (75), 79 (66), 78 (60), 77 (56) and 52 (100).

The crude 1-chloro-1,2-dihydro-7-methylpyrrolizin-3-one obtained above was quenched with a mixture of water (15 cm<sup>3</sup>) and acetone (4 cm<sup>3</sup>) and stirred at room temperature for 35 min. After work-up<sup>2</sup> and dry flash chromatography gave unreacted 7-methylpyrrolizin-3-one **16** (66 mg, 23%), 1,2-dihydro-1-ethoxy-7-methylpyrrolizin-3-one formed fortuitously as a yellow liquid, (20 mg, 5%), bp 40-45 °C (0.2 Torr) (Found: M<sup>+</sup>, 179.0946. C<sub>10</sub>H<sub>13</sub>NO<sub>2</sub> requires *M*, 179.0946); δ<sub>H</sub> 6.97 (1H, d, <sup>3</sup>*J* 3.0), 6.30 (1H, dd, <sup>3</sup>*J* 3.0 and <sup>n</sup>*J* 0.3), 4.93 (1H, ddd, <sup>3</sup>*J* 6.7 and 1.8, <sup>n</sup>*J* 0.7), 3.45-3.63 (2H, two dq at 3.51 and 3.57, <sup>2</sup>*J* 8.8 and <sup>3</sup>*J* 7.0), 3.26 (1H, dd, <sup>2</sup>*J* 18.4 and <sup>3</sup>*J* 6.7), 2.91 (1H, dd, <sup>2</sup>*J* 18.4 and <sup>3</sup>*J* 1.8), 2.10 (3H, s) and 1.22 (3H, t, <sup>3</sup>*J* 7.0); δ<sub>C</sub> 169.20 (quat), 135.11 (quat), 121.27, 117.85 (quat), 111.61, 68.47, 64.10, 43.11, 15.18 and 10.31; *m/z* 179 (M<sup>+</sup>, 87%), 150 (43), 136 (37), 135 (62), 134 (100), 133 (65), 122 (47), 108 (74), 107 (62), 106 (78), 105 (61), 104 (70), 94 (51), 93 (71), 80 (59), 79 (68), 78 (61) and 77 (58) and 1,2-dihydro-1-hydroxy-7-methylpyrrolizin-3-one **45** (199 mg, 62%) as an orange oil, bp 165-170 °C (0.3 Torr) (Found: M<sup>+</sup>, 151.0634. C<sub>8</sub>H<sub>9</sub>NO<sub>2</sub> requires *M*, 151.0633); δ<sub>H</sub> 6.95 (1H, d, <sup>3</sup>*J* 3.1), 6.31 (1H, dd, <sup>3</sup>*J* 3.1 and <sup>n</sup>*J* 0.4), 5.26 (1H, br d, <sup>3</sup>*J* 6.9), 3.37 (1H, dd, <sup>2</sup>*J* 18.7 and <sup>3</sup>*J* 6.9), 2.87 (1H, dd, <sup>2</sup>*J* 18.7 and <sup>3</sup>*J* 2.0), 2.36 (1H, br, OH) and 2.11 (3H, s); δ<sub>C</sub> 169.18 (quat), 136.76 (quat), 121.50, 117.40 (quat), 111.47, 61.81, 46.01 and 10.31; *m/z* 151 (M<sup>+</sup>, 58%), 134 (56), 108 (67), 104 (58), 80 (53) and 41 (100 %).

### 1-Acetoxy-1,2-dihydro-7-methylpyrrolizin-3-one 48

Quenching 1-chloro-1,2-dihydro-7-methylpyrrolizin-3-one [from 7-methylpyrrolizin-3-one **16** (257 mg, 1.9 mmol)] with sodium acetate (0.22 g, 2.7 mmol) in glacial acetic acid (20 cm<sup>3</sup>) over 1 h gave, after workup<sup>2b</sup> and dry flash chromatography, unreacted 7-methylpyrrolizin-3-one **16** (28 mg, 11%) and 1-acetoxy-1,2-dihydro-7-methylpyrrolizin-3-one **48** (182 mg, 49%) as a colourless oil, bp 100-105 (0.3 Torr) (Found: M<sup>+</sup>, 193.0741. C<sub>10</sub>H<sub>11</sub>NO<sub>3</sub> requires *M*, 193.0739); δ<sub>H</sub> 7.02 (1H, d, <sup>3</sup>*J* 3.1), 6.33 (1H, d, <sup>3</sup>*J* 3.1), 6.12 (1H, br d, <sup>3</sup>*J* 7.3), 3.46 (1H, dd, <sup>2</sup>*J* 19.0 and <sup>3</sup>*J* 7.3), 2.90 (1H, dd, <sup>2</sup>*J* 19.0 and <sup>3</sup>*J* 1.8), 2.08 (3H, s) and 2.06 (3H, s); δ<sub>C</sub> 170.45 (quat), 168.13 (quat), 132.78 (quat), 121.66, 118.81 (quat), 112.35, 63.17, 43.15, 20.75 and 10.27; *m/z* 193 (M<sup>+</sup>, 35%), 135 (56), 134 (100), 133 (77), 109 (56), 108 (53), 106 (82), 105 (78), 104 (59), 80 (45), 79 (62), 78 (52) and 77 (53).

### 1-Acetoxy-1,2-dihydro-7-methoxycarbonylpyrrolizin-3-one 52

As described above, hydrochlorination of 7-methoxycarbonylpyrrolizin-3-one **26** (over 2 days) gave 1-chloro-1,2-dihydro-7-methoxycarbonylpyrrolizin-3-one as a yellow liquid, (Found: M<sup>+</sup>, 213.0196. C<sub>9</sub>H<sub>8</sub>ClNO<sub>3</sub> requires *M*, 213.0193); δ<sub>H</sub> 7.07 (1H, d, <sup>3</sup>*J* 3.2), 6.86 (1H, d, <sup>3</sup>*J* 3.2), 5.57 (1H, dd, <sup>3</sup>*J* 7.2 and 1.5), 3.86 (3H, s), 3.69 (1H, dd, <sup>2</sup>*J* 19.3 and <sup>3</sup>*J* 7.2) and 3.27 (1H, dd, <sup>2</sup>*J* 19.3 and <sup>3</sup>*J* 1.5); δ<sub>C</sub> 167.82 (quat), 162.95 (quat), 142.91 (quat),

119.20, 114.32 (quat), 113.09, 51.67, 45.92 and 45.25;  $m/z$  215 ( $M^+$ , 12%), 213 ( $M^+$ , 34), 179 (24), 178 (100), 177 (26), 147 (23), 146 (92), 119 (31), 118 (40) and 63 (43).

Quenching the chloro-compound [from **26** (207 mg, 1.2 mmol)] with sodium acetate (300 mg, 3.7 mmol) in glacial acetic acid (12 cm<sup>3</sup>) for 30 h at room temperature followed by 4.5 h at 60 °C and work-up as previously described gave three major products after dry flash chromatography: unreacted 7-methoxycarbonylpyrrolizin-3-one **26** (46 mg, 22%), 1-acetoxy-1,2-dihydro-7-methoxycarbonylpyrrolizin-3-one **52** (53 mg, 19%) as a yellow solid, mp 93-94 °C (after sublimation) (Found:  $M^+$ , 237.0641. C<sub>11</sub>H<sub>11</sub>NO<sub>5</sub> requires  $M$ , 237.0637);  $\delta_H$  7.09 (1H, d,  $^3J$  3.3), 6.87 (1H, d,  $^3J$  3.3), 6.42 (1H, dd,  $^3J$  7.1 and 1.9), 3.80 (3H, s), 3.53 (1H, dd,  $^2J$  19.2 and  $^3J$  7.1), 2.92 (1H, dd,  $^2J$  19.2 and  $^3J$  1.9) and 2.10 (3H, s);  $\delta_C$  169.80 (quat), 168.36 (quat), 163.01 (quat), 141.25 (quat), 119.01, 114.57 (quat), 113.04, 62.54, 51.51, 42.29 and 20.55;  $m/z$  237 ( $M^+$ , 11%), 195 (20), 194 (71), 178 (21), 177 (23), 164 (14), 163 (19), 162 (100), 146 (36), 134 (13), 118 (11), 103 (11) and 103 (11); 1,2-dihydro-1-hydroxy-7-methoxycarbonylpyrrolizin-3-one (14 mg, 6%) only partially separated from its 1-acetoxy analogue; identified by its <sup>1</sup>H NMR spectrum:  $\delta_H$  6.99 (1H, d,  $^3J$  3.3), 6.74 (1H, d,  $^3J$  3.3), 5.46 (1H, dd,  $^3J$  7.3 and 3.3), 3.88 (3H, s), 3.40 (1H, dd,  $^2J$  18.8 and  $^3J$  7.3) and 3.03 (1H, dd,  $^2J$  18.8 and  $^3J$  3.3).

#### 7-Acetoxymethyl-1,2-dihydro-1-hydroxypyrrolizin-3-one **55**

Our previous method,<sup>2b</sup> involving treatment of 7-acetoxymethylpyrrolizin-3-one<sup>2</sup> **31** (231 mg, 1.2 mmol) with dry HCl and quenching the resulting chloro-compound with a mixture of water (10 cm<sup>3</sup>) and acetone (2.5 cm<sup>3</sup>) over 30 min was scaled up, to allow full characterisation of the product. Standard work-up<sup>2b</sup> gave 7-acetoxymethyl-1,2-dihydro-1-hydroxypyrrolizin-3-one **55** as a colourless oil which crystallised on standing (233 mg, 92%), mp 59.5-60 °C (from hexane) (Found: C, 57.55; H, 5.25; N, 6.6. C<sub>10</sub>H<sub>11</sub>NO<sub>4</sub> requires C, 57.4; H, 5.25; N, 6.7%);  $\delta_H$  6.95 (1H, d,  $^3J$  3.2), 6.42 (1H, d,  $^3J$  3.2), 5.30 (1H, dd,  $^3J$  6.9 and 1.9), 5.13 (1H, d,  $^2J$  12.5), 4.82 (1H, d,  $^2J$  12.5), 4.15 (1H, br s, OH), 3.29 (1H, dd,  $^2J$  18.7 and  $^3J$  6.9), 2.87 (1H, dd,  $^2J$  18.7 and  $^3J$  1.9) and 2.02 (3H, s);  $\delta_C$  171.91 (quat), 169.54 (quat), 140.31 (quat), 119.37, 115.48 (quat), 111.88, 60.98, 58.02, 44.62 and 20.89;  $m/z$  209 ( $M^+$ , 17%), 191 (10), 150 (33), 149 (100), 121 (20), 108 (37), 104 (22), 93 (22), 79 (28), 53 (22) and 52 (22).

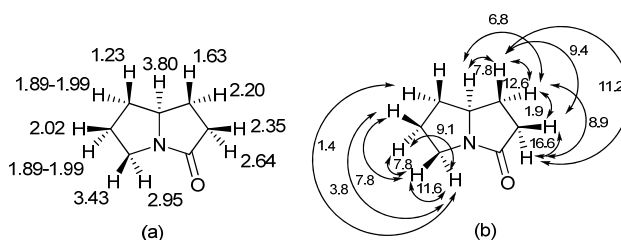

**Fig. S1** (a) <sup>1</sup>H NMR chemical shifts of pyrrolizin-3-one **4** ([<sup>2</sup>H]chloroform); (b) assigned <sup>1</sup>H-<sup>1</sup>H coupling constants of **4** (Hz)

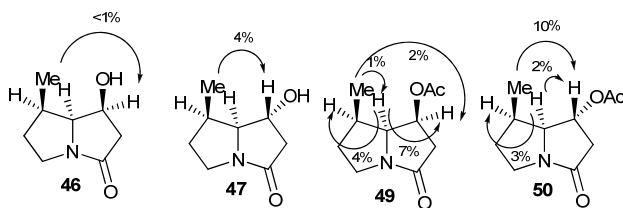

**Fig. S2** NOE results for **46** and **47**, and for **49** and **50** (only one of the enantiomeric pairs is shown).

**Table S1.** Effect of catalysts and solvent on the hydrogenation of **31**.

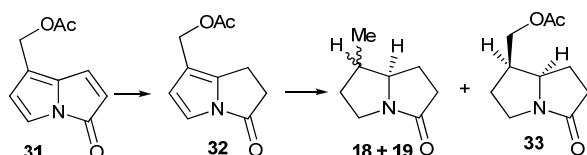

| Catalyst                             | Solvent       | Products                |
|--------------------------------------|---------------|-------------------------|
| 5% Pd-C                              | ethyl acetate | <b>32</b>               |
| 5% Pd-C                              | ethanol       | <b>18</b> and <b>19</b> |
| 5% Pd-CaCO <sub>3</sub>              | ethyl acetate | <b>32</b>               |
| PtO <sub>2</sub>                     | ethyl acetate | <b>18</b> and <b>19</b> |
| 5% Rh-C                              | ethyl acetate | <b>32</b>               |
| 5% Rh-C                              | ethanol       | <b>33</b> and <b>18</b> |
| 5% Rh-Al <sub>2</sub> O <sub>3</sub> | ethanol       | <b>18</b> and <b>19</b> |
| 5% Rh-Al <sub>2</sub> O <sub>3</sub> | acetic acid   | <b>18</b> and <b>19</b> |

**Table S2.** Effect of catalysts and solvent on the diastereoselectivity of hydrogenation of **34** (45 psi, 2 h).

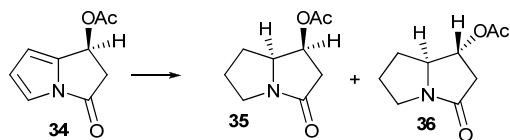

| Catalyst                             | Solvent       | Ratio 35 : 36       |
|--------------------------------------|---------------|---------------------|
| 5% Pd/C                              | ethanol       | 93 : 7 <sup>a</sup> |
| 5% Pd/CaCO <sub>3</sub>              | ethanol       | <b>35</b> only      |
| PtO <sub>2</sub>                     | ethanol       | 89 : 11             |
| 5% Rh/Al <sub>2</sub> O <sub>3</sub> | ethyl acetate | 92 : 8              |
| 5% Rh/Al <sub>2</sub> O <sub>3</sub> | ethanol       | 92 : 8              |

<sup>a</sup>95 : 5 ratio obtained on scale-up

**Table S3.** Effect of catalysts and solvent on the diastereoselectivity of hydrogenation of **38** (45 psi, 2 h).

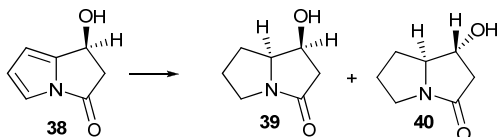

| Catalyst                             | Solvent       | Ratio 39 : 40        |
|--------------------------------------|---------------|----------------------|
| 5% Pd-C                              | ethyl acetate | 88 : 12              |
| 5% Pd-C                              | ethanol       | 83 : 17              |
| 5% Pd-CaCO <sub>3</sub>              | ethyl acetate | - <sup>a</sup>       |
| 5% Pd-CaCO <sub>3</sub>              | ethanol       | 90 : 10 <sup>b</sup> |
| PtO <sub>2</sub>                     | ethanol       | 88 : 12              |
| 5% Rh-C                              | ethanol       | 86 : 14              |
| 5% Rh-Al <sub>2</sub> O <sub>3</sub> | ethyl acetate | 85 : 15              |
| 5% Rh-Al <sub>2</sub> O <sub>3</sub> | propan-2-ol   | 86 : 14              |
| 5% Rh-Al <sub>2</sub> O <sub>3</sub> | ethanol       | 90 : 10              |

<sup>a</sup>no reaction; <sup>b</sup>presence of remaining starting material

**Table S4.** Selected <sup>1</sup>H NMR data of *cis*-1-substituted pyrrolizidin-3-ones.

| R <sub>1</sub> | H <sub>2a</sub> |         |                     | H <sub>2b</sub> |         |                     |
|----------------|-----------------|---------|---------------------|-----------------|---------|---------------------|
|                | δ (ppm)         | pattern | <sup>n</sup> J (Hz) | δ (ppm)         | pattern | <sup>n</sup> J (Hz) |
| Me             | 2.84            | ddt     | 16.3, 8.0, 1.1      | 1.98            | dd      | 16.3, 2.7           |
| OH             | 2.88            | ddt     | 16.7, 4.9, 1.2      | 2.34            | d       | 16.7                |
| OAc            | 2.97            | ddt     | 17.6, 5.6, 1.2      | 2.40            | d       | 17.2                |

**Table S5.** Effect of catalysts and solvent on the diastereoselectivity of hydrogenation of **45**.

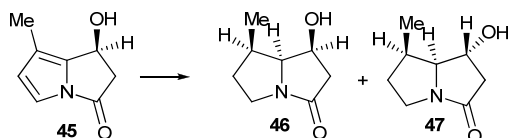

| Catalyst                             | Solvent       | 46 : 47              |
|--------------------------------------|---------------|----------------------|
| 5% Rh-C                              | ethanol       | 67 : 33 <sup>a</sup> |
| 5% Rh-C                              | ethyl acetate | - <sup>b</sup>       |
| 5% Rh-Al <sub>2</sub> O <sub>3</sub> | ethanol       | 64 : 36 <sup>a</sup> |
| 5% Pd-CaCO <sub>3</sub>              | ethanol       | 40 : 60              |

<sup>a</sup>presence of a third minor isomer; <sup>b</sup>no reaction

**Table S6.** Effect of catalysts and solvent on the diastereoselectivity of hydrogenation of **48**.

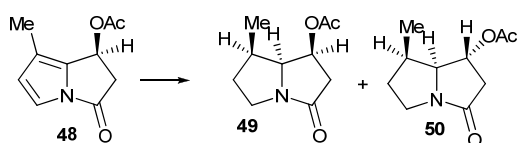

| Catalyst                             | Solvent       | 49 : 50                |
|--------------------------------------|---------------|------------------------|
| 5% Pd-C                              | ethanol       | 40 : 60 <sup>a</sup>   |
| 5% Rh-Al <sub>2</sub> O <sub>3</sub> | ethyl acetate | 72 : 28                |
| 5% Rh-C                              | ethyl acetate | 83 : 17 <sup>a,b</sup> |
| 5% Rh-C                              | ethanol       | 79 : 21 <sup>a</sup>   |

<sup>a</sup>presence of a third isomer; <sup>b</sup>86 : 14 ratio on a 106 mg scale

## References

- 1 S. E. Campbell, M. C. Comer, P. A. Derbyshire, X. L. M. Despinoy, H. McNab, R. Morrison, C. C. Sommerville and C. Thornley, *J. Chem. Soc., Perkin Trans. 1*, 1997, 2195-2202.
- 2 (a) H. McNab and C. Thornley, *J. Chem. Soc., Chem. Commun.*, 1993, 1570-1571; (b) H. McNab and C. Thornley, *J. Chem. Soc., Perkin Trans. 1*, 2000, 3584-3591.
